# Supplementary material for: Efficient preconcentration of ultra-trace rhenium from geological materials via induced adsorption for accurate isotope analysis
Source: Royal Society of Chemistry journal article supplement (doi:10.1039/d4ja00295d), 2024-01-01
Supplement: d4ja00295d1.pdf [file d4ja00295d1.pdf]

## Electronic Supporting Information

### Efficient preconcentration of ultra-trace rhenium in geological materials by induced adsorption for accurate isotope analysis

Yumeng Liu<sup>a</sup>, Tianyu Chen<sup>\*a</sup>, Tao Li<sup>b</sup>, Weiqiang Li<sup>a</sup>, Qingquan Hong<sup>a</sup>, Jiubin Chen<sup>c</sup>

<sup>a</sup>State Key Laboratory for Mineral Deposits Research, School of Earth Sciences and Engineering and Frontiers Science Center for Critical Earth Material Cycling, Nanjing University, Nanjing 210046, China

<sup>b</sup>State Key Laboratory of Palaeobiology and Stratigraphy, Nanjing Institute of Geology and Palaeontology, Chinese Academy of Sciences, Nanjing 210008, China

<sup>c</sup>School of Earth System Science, Institute of Surface-Earth System Science, Tianjin University, Tianjin 300072, China

\*corresponding author: Tianyu Chen; Email: [tianyuchen@nju.edu.cn](mailto:tianyuchen@nju.edu.cn)

#### Table of Contents

Table S1. Column chemistry procedure.

Table S2. Rhenium removal rates from aqueous solutions under different conditions.

Table S3. Rhenium recoveries by CuS coprecipitation working on 50 ml seawater.

Table S4. Rhenium recoveries and isotopic results for synthetic solutions.

Table S5. Rhenium isotopic results for geological materials.

Fig. S1. Elution curves of the column chemistry.

Fig. S2. Element/Re ratios after one column separation.

Table S1. Column chemistry procedure

| step          | reagents and dosage              |                                                                      |
|---------------|----------------------------------|----------------------------------------------------------------------|
|               | this study                       | reference <sup>1</sup>                                               |
| Resin filling | 0.2ml AG1-X8 resin               | 1ml AG1-X8 resin                                                     |
| Precleaning   | 3ml 8N HNO <sub>3</sub> + 2ml MQ | 30ml 8N HNO <sub>3</sub> + 5 ml MQ                                   |
| Conditioning  | 3ml 0.5N HCl                     | 5ml 1N HCl                                                           |
| Loading       | 2ml 0.5N HCl                     | 2-50ml 1N HCl                                                        |
| Rinse         | 16ml 0.5N HCl                    | 10ml 1N HCl + 15ml 0.5N HNO <sub>3</sub> + 1.5ml 4N HNO <sub>3</sub> |
| Collection    | 2ml 8N HNO <sub>3</sub>          | 12.5ml 4N HNO <sub>3</sub>                                           |

Table S2. Rhenium removal rates from aqueous solutions under different conditions.

| SW/MQ <sup>a</sup> | medium                | Na <sub>2</sub> S<br>(M) | AC <sup>b</sup><br>(g/L) | reaction<br>time<br>(hours) | initial Re<br>concentration<br>(ppb) | Re removal<br>(%) |
|--------------------|-----------------------|--------------------------|--------------------------|-----------------------------|--------------------------------------|-------------------|
| MQ                 | 0.3M HNO <sub>3</sub> | 0.004                    | 0.5                      | 18                          | 94.32                                | 58.8              |
| MQ                 | 0.3M HNO <sub>3</sub> | 0.01                     | 0.5                      | 1                           | 93.76                                | 52.6              |
| MQ                 | 0.3M HNO <sub>3</sub> | 0.02                     | 0.5                      | 18                          | 92.86                                | 98.4              |
| MQ                 | 0.3M HNO <sub>3</sub> | 0.04                     | 0.5                      | 18                          | 91.29                                | 99.8              |
| MQ                 | 0.3M HNO <sub>3</sub> | 0.01                     | 1.5                      | 18                          | 93.92                                | 99.4              |
| MQ                 | 0.3M HNO <sub>3</sub> | 0.01                     | 0.5                      | 18                          | 94.11                                | 93.0              |
| MQ                 | 0.3M HNO <sub>3</sub> | 0.01                     | 0.25                     | 18                          | 93.78                                | 91.4              |
| MQ                 | 0.6M HNO <sub>3</sub> | 0.01                     | 0.5                      | 18                          | 91.71                                | 95.7              |
| MQ                 | 0.6M HNO <sub>3</sub> | 0.02                     | 0.5                      | 18                          | 90.42                                | 99.7              |
| MQ                 | 0.5M HCl              | 0.01                     | 0.5                      | 18                          | 90.15                                | 98.9              |
| MQ                 | 0.5M HCl              | 0.02                     | 0.5                      | 18                          | 89.69                                | 99.9              |
| SW                 | 0.3M HNO <sub>3</sub> | 0.004                    | 0.5                      | 18                          | 444.96                               | 83.2              |
| SW                 | 0.3M HNO <sub>3</sub> | 0.01                     | 0.5                      | 18                          | 429.34                               | 96.0              |
| SW                 | 0.3M HNO <sub>3</sub> | 0.02                     | 0.5                      | 18                          | 459.79                               | 99.8              |
| SW                 | 0.3M HNO <sub>3</sub> | 0.04                     | 0.5                      | 18                          | 435.32                               | 100.0             |
| SW                 | 0.3M HNO <sub>3</sub> | 0.01                     | 1                        | 18                          | 468.46                               | 97.4              |

<sup>a</sup> SW = seawater, MQ = Milli-Q water.

<sup>b</sup> AC = activated carbon.

Table S3. Rhenium recoveries by CuS coprecipitation working on 50 ml seawater.

| number         | reagents and dosage                                                                                                                              | recovery (%) |
|----------------|--------------------------------------------------------------------------------------------------------------------------------------------------|--------------|
| 1              | 0.075mM CuSO <sub>4</sub> + 0.05mM Na <sub>2</sub> S                                                                                             | 0.5          |
| 2              | 0.05mM FeSO <sub>4</sub> + 0.1mM CuSO <sub>4</sub> + 0.1mM Na <sub>2</sub> S                                                                     | 1.0          |
| 3              | 0.4mM cysteine + 0.15mM CuSO <sub>4</sub> + 0.25mM Na <sub>2</sub> S                                                                             | 0.5          |
| 4              | 0.2mM cysteine + 0.05mM FeSO <sub>4</sub> + 0.1mM CuSO <sub>4</sub> + 0.25mM Na <sub>2</sub> S                                                   | 0.7          |
| 5              | 0.4mM NH <sub>2</sub> OH•HCl + 0.1mM FeSO <sub>4</sub> + 0.1mM CuSO <sub>4</sub> + 0.1mM Na <sub>2</sub> S                                       | 0.4          |
| 6              | 3mM NH <sub>2</sub> OH•HCl + 0.2mM cysteine + 0.2mM FeSO <sub>4</sub> + 0.1mM CuSO <sub>4</sub> + 0.1mM Na <sub>2</sub> S                        | 0.4          |
| 7 <sup>a</sup> | 3mM NH <sub>2</sub> OH•HCl + 0.2mM cysteine + 0.2mM FeSO <sub>4</sub> + 0.1mM CuSO <sub>4</sub> + 0.1mM Na <sub>2</sub> S                        | 0.6          |
| 8              | 0.4mM cysteine + 1.4mM FeSO <sub>4</sub> + 2mM Na <sub>2</sub> S                                                                                 | 0.6          |
| 9              | 3mM NH <sub>2</sub> OH•HCl + 0.2mM cysteine + 0.1mM FeSO <sub>4</sub> + 0.2mM CuSO <sub>4</sub> + 0.2mM Na <sub>2</sub> S + 1g/L montmorillonite | 4.5          |
| 10             | 3mM NH <sub>2</sub> OH•HCl + 0.2mM cysteine + 0.1mM FeSO <sub>4</sub> + 0.2mM CuSO <sub>4</sub> + 0.2mM Na <sub>2</sub> S + 1g/L kaolinite       | 3.6          |

<sup>a</sup> The solution remained undisturbed for 18 hours before filtration.

Table S4. Rhenium recoveries and isotopic results for synthetic solutions. The doped AAS Re exhibits  $\delta^{187}\text{Re}$  of  $-0.50\pm 0.05\%$  (2SD, n=28).

| number | matrix          | recovery (%) | $\delta^{187}\text{Re}$ (‰) |
|--------|-----------------|--------------|-----------------------------|
| 1      | MQ              | 100.0        | $-0.46\pm 0.04$             |
| 2      | MQ              | 101.2        | $-0.47\pm 0.03$             |
| 3      | DS <sup>a</sup> | 96.3         | $-0.47\pm 0.04$             |
| 4      | DS              | 95.1         | $-0.49\pm 0.04$             |
| 5      | DS              | 97.0         | $-0.48\pm 0.03$             |
| 6      | Seawater        | 102.1        | $-0.51\pm 0.04$             |
| 7      | Seawater        | 98.9         | $-0.51\pm 0.04$             |
| 8      | Seawater        | 105.5        | $-0.50\pm 0.04$             |
| 9      | Seawater        | 103.3        | $-0.51\pm 0.04$             |
| 10     | Seawater        | 97.0         | $-0.49\pm 0.05$             |

<sup>a</sup> DS refers to the BHVO-2 digested solution.

Table S5. Rhenium isotopic results for geological materials. The analyte concentration of ~2 ppb corresponded to internal errors of ~0.12‰ (2 SE). Increasing the analyte concentration to ~4 ppb reduced the internal error to ~0.08‰ (2 SE).

| materials | $\delta^{187}\text{Re}$ (‰)                                                                       |
|-----------|---------------------------------------------------------------------------------------------------|
| MAG-1     | -0.33±0.13, -0.37±0.13, -0.31±0.10, -0.20±0.13, -0.35±0.16, -0.25±0.13                            |
| SBC-1     | -0.47±0.09, -0.46±0.14, -0.47±0.14, -0.41±0.11                                                    |
| SGR-1     | -0.29±0.13, -0.30±0.11, -0.23±0.12, -0.20±0.13, -0.32±0.12                                        |
| SDO-1     | -0.06±0.12, -0.13±0.11, -0.14±0.11, -0.12±0.08, -0.10±0.08, -0.03±0.12,<br>-0.14±0.12, -0.12±0.07 |
| BCR-2     | -0.36±0.14, -0.35±0.11, -0.37±0.13, -0.29±0.15, -0.23±0.11, -0.37±0.12                            |
| BHVO-2    | -0.40±0.12, -0.39±0.17, -0.28±0.15                                                                |
| BIR-1     | -0.32±0.10                                                                                        |
| Seawater  | -0.21±0.12, -0.22±0.10, -0.25±0.11, -0.19±0.08, -0.16±0.06, -0.22±0.08,<br>-0.23±0.10, -0.20±0.10 |

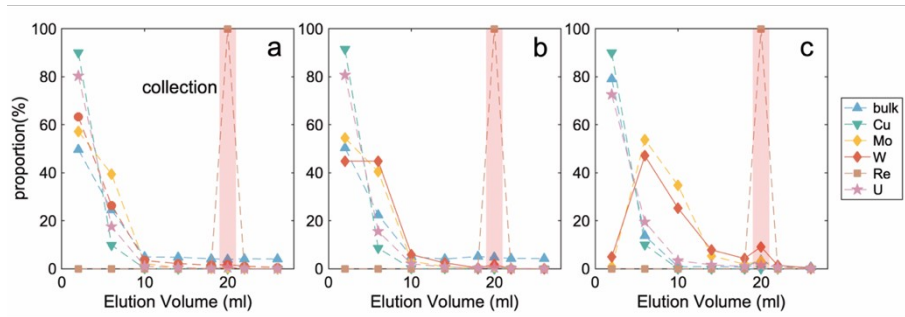

Fig. S1. Elution curves of the column chemistry. Preconcentrated BCR-2 (a), SDO-1 (b), and seawater (c) were tested, respectively.

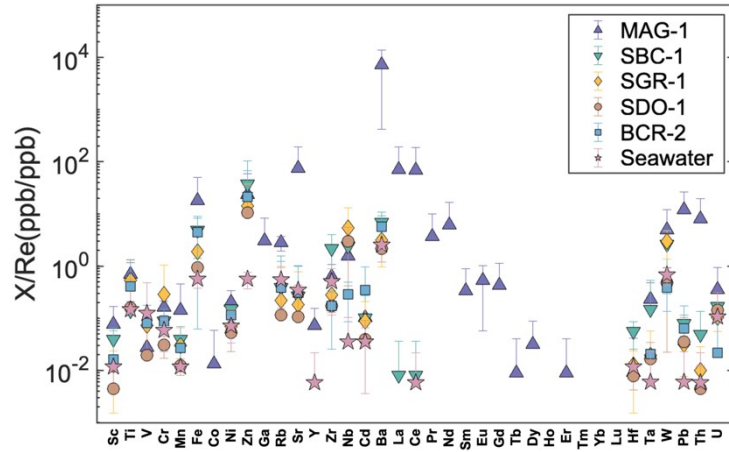

Fig. S2. Element/Re ratios after one column separation. Major elements like Na, Mg, Al, K, and Ca were not measured. The error bar was 2SD for repeated measurements (3 for MAG-1, 3 for SBC-1, 3 for SGR-1, 3 for SDO-1, 4 for BCR-2, and 2 for seawater). Ratios less than 0.001 were not shown in this figure.



## References

- (1) Dellinger, M.; Hilton, R. G.; Nowell, G. M. Measurements of rhenium isotopic composition in low-abundance samples. *Journal of Analytical Atomic Spectrometry* **2020**, *35* (2), 377-387, 10.1039/C9JA00288J. DOI: 10.1039/C9JA00288J.
